# Supplementary material for: Increased Risk to Develop Hypertension and Carotid Plaques in Patients with Long-Lasting Helicobacter pylori Gastritis
Source: MDPI journal article supplement (doi:10.3390/jcm11092282), 2022-04-19
Supplement: s1 [file s1]

**Table S1.** Logistic regression for blood hypertension in male and female participants.

| Variables                             | Males                     |                                    | Females                   |                                    |
|---------------------------------------|---------------------------|------------------------------------|---------------------------|------------------------------------|
|                                       | Unadjusted<br>OR (95% CI) | Adjusted<br>OR (95% CI)            | Unadjusted<br>OR (95% CI) | Adjusted<br>OR (95% CI)            |
| Age (years)                           |                           |                                    |                           |                                    |
| 30-49 years                           | Ref.                      | Ref.                               | Ref.                      | Ref.                               |
| 50-59 years                           | 4.78 (3.47 – 6.59) **     | 3.92 (2.82 – 5.44) **              | 5.12 (4.02 – 6.54) **     | 4.62 (3.60 – 5.91) **              |
| 60-69 years                           | 8.94 (6.60 – 12.11) **    | 6.97 (5.11 – 9.52) **              | 11.87 (9.40 – 14.98) **   | 9.68 (7.62 – 12.29) **             |
| 70-79 years                           | 14.41 (10.51 – 19.77) **  | 10.89 (7.87 – 15.07) **            | 18.23 (14.22 – 23.36) **  | 14.53 (11.25 – 18.75) **           |
| ≥ 80 years                            | 11.28 (7.27 – 17.52) **   | 8.66 (5.49 – 13.65) **             | 20.54 (14.45 – 29.19) **  | 16.86 (11.73 – 24.23) **           |
| Body mass index                       |                           |                                    |                           |                                    |
| < 25 kg/m <sup>2</sup>                | Ref.                      | Ref.                               | Ref.                      | Ref.                               |
| 25-29 kg/m <sup>2</sup>               | 1.48 (1.22 – 1.78) **     | 1.17 <sup>§</sup> (0.95 – 1.44)    | 1.92 (1.66 – 2.22) **     | 1.44 <sup>§</sup> (1.22 – 1.69) ** |
| ≥ 30 kg/m <sup>2</sup>                | 1.95 (1.51 – 2.51) **     | 1.43 <sup>§</sup> (1.07 – 1.91) *  | 2.37 (1.96 – 2.86) **     | 2.26 <sup>§</sup> (1.81 – 2.81) ** |
| Smoke                                 |                           |                                    |                           |                                    |
| Never smoker                          | Ref.                      | Ref.                               | Ref.                      | Ref.                               |
| Former smoker                         | 1.04 (0.87 – 1.24)        | 0.99 <sup>§</sup> (0.82 – 1.21)    | 0.87 (0.77 – 1.01)        | 0.88 <sup>§</sup> (0.75 – 1.02)    |
| Current smoker                        | 1.92 (1.41 – 2.63) **     | 1.66 <sup>§</sup> (1.19 – 2.33) ** | 0.93 (0.80 – 1.07)        | 0.79 <sup>§</sup> (0.52 – 1.21)    |
| Dyslipidemia                          |                           |                                    |                           |                                    |
| No                                    | Ref.                      | Ref.                               | Ref.                      | Ref.                               |
| Yes                                   | 4.60 (3.47 – 6.11) **     | 2.92 <sup>§</sup> (2.15 – 3.97) ** | 3.71 (3.11 – 4.43) **     | 2.18 <sup>§</sup> (1.79 – 2.65) ** |
| Diabetes                              |                           |                                    |                           |                                    |
| No                                    | Ref.                      | Ref.                               | Ref.                      | Ref.                               |
| Yes                                   | 4.81 (3.73 – 6.21) **     | 2.37 <sup>§</sup> (1.80 – 3.12) ** | 4.83 (3.84 – 6.07) **     | 2.10 <sup>§</sup> (1.64 – 2.69) ** |
| History of <i>H. pylori</i> infection |                           |                                    |                           |                                    |
| No                                    | Ref.                      | Ref.                               | Ref.                      | Ref.                               |
| Yes                                   | 1.19 (0.67 – 2.09)        | 1.37 <sup>#</sup> (0.73 – 2.56)    | 1.22 (0.86 – 1.73)        | 1.02 <sup>#</sup> (0.67 – 1.55)    |
| <i>H. pylori</i> status               |                           |                                    |                           |                                    |
| No infection                          | Ref.                      | Ref.                               | Ref.                      | Ref.                               |
| Long-lasting infection <sup>§</sup>   | 1.34 (1.09 – 1.65) *      | 1.27 (1.01 – 1.60) *               | 1.33 (1.13 – 1.55) **     | 1.25 (1.06 – 1.48) **              |
| Current infection <sup>†</sup>        | 0.95 (0.77 – 1.12)        | 0.97 <sup>#</sup> (0.77 – 1.17)    | 1.09 (0.94 – 1.27)        | 1.08 <sup>#</sup> (0.92 – 1.26)    |

<sup>§</sup> adjusted for all covariates except for *Helicobacter pylori* infection; <sup>#</sup> adjusted for sex, age groups, BMI, smoke, dyslipidemia and diabetes.

\*  $p < 0.05$ ; \*\*  $p < 0.01$ .
